1

2 **Metabarcoding analysis on European coastal samples**  
3 **reveals new molecular metazoan diversity**

4

5 David López-Escardó<sup>1</sup>, Jordi Paps<sup>2</sup>, Colomán de Vargas<sup>3,4</sup>, Ramon Massana<sup>5</sup>, Iñaki  
6 Ruiz-Trillo<sup>1,6,7\*</sup>, Javier del Campo<sup>1,5\*</sup>

7

8 <sup>1</sup>*Institut de Biologia Evolutiva (CSIC-Universitat Pompeu Fabra), Passeig Marítim*  
9 *de la Barceloneta 37-49, 08003 Barcelona, Catalonia, Spain.*

10 <sup>2</sup>*School of Biological Sciences, University of Essex, Wivenhoe Park, Colchester, CO4*  
11 *3SQ, UK*

12 <sup>3</sup>*CNRS, UMR 7144, Adaptation et Diversité en Milieu Marin, Station Biologique de*  
13 *Roscoff, Roscoff, France*

14 <sup>4</sup>*UPMC Univ. Paris 06, UMR 7144, Station Biologique de Roscoff, Roscoff, France*

15 <sup>5</sup>*Department of Marine Biology and Oceanography, Institut de Ciències del Mar*  
16 *(CSIC), Barcelona, Catalonia, Spain*

17 <sup>6</sup>*ICREA, Pg. Lluís Companys 23, 08010 Barcelona, Catalonia, Spain*

18 <sup>7</sup>*Departament de Genètica, Microbiologia i Estadística, Universitat de Barcelona,*  
19 *Barcelona, Catalonia, Spain*

20            *\*Correspondence and requests for materials should be addressed to JdC (email:*  
21                    *jdelcampo@icm.csic.es) or IR-T (email: inaki.ruiz@ibe.upf-csic.es).*

22     **Abstract**

23     Although animals are among the best studied organisms, we still lack a full  
24     description of their diversity, especially for microscopic taxa. This is partly due to the  
25     time-consuming and costly nature of surveying animal diversity through  
26     morphological and molecular studies of individual taxa. A powerful alternative is the  
27     use of high-throughput environmental sequencing, providing molecular data from all  
28     organisms sampled. We here address the unknown diversity of animal phyla in marine  
29     environments using an extensive dataset designed to assess eukaryotic ribosomal  
30     diversity among European coastal locations. A multi-phylum assessment of marine  
31     animal diversity that includes water column and sediments, oxic and anoxic  
32     environments, and both DNA and RNA templates, revealed a high percentage of  
33     novel 18S rRNA sequences in most phyla, suggesting that marine environments have  
34     not yet been fully sampled at a molecular level. This novelty is especially high among  
35     Platyhelminthes, Acoelomorpha, and Nematoda, which are well studied from a  
36     morphological perspective and abundant in benthic environments. We also identified  
37     based on molecular data a potentially novel group of widespread tunicates. Moreover,  
38     we recovered a high number of reads for Ctenophora and Cnidaria in the smaller  
39     fractions suggesting their gametes might play a greater ecological role than previously  
40     suspected.

41

## 42 **Introduction**

43 The animal kingdom is one of the best-studied branches of the tree of life <sup>1</sup>, with more  
44 than 1.5 million species described in around 35 different phyla <sup>2</sup>. Some authors have  
45 suggested there may be more than 10 million species of animals, indicating that there  
46 is an extensive unknown animal diversity. This hidden diversity may vary according  
47 to the animal phyla considered. Not surprisingly, those animal phyla with microscopic  
48 representatives (i.e., those animals with a size below 2mm <sup>3</sup>, also known as  
49 micrometazoans <sup>4</sup>) are suggested to contain most of this potential unknown diversity  
50 <sup>3</sup>.

51  
52 Marine environments cover most of the earth's surface. More importantly, all  
53 metazoan phyla, except onychophorans, have marine representatives, with up to 60%  
54 including microscopic members <sup>5</sup>. Copepods, for instance, are the most abundant  
55 multicellular group of organisms on earth <sup>6</sup>, highlighting the key role of microbial  
56 animals in marine ecosystems. Given that the marine benthic meiofauna is also one of  
57 the hot spots of alpha-diversity in the biosphere, marine environments thus appear to  
58 be ideal sites in which to analyze animal diversity across phyla.

59  
60 Classical methods to survey animal diversity, such as isolation and morphological  
61 identification, might be ineffective to comprehensively analyze  
62 micro/mesozooplanktonic <sup>7</sup> and meiofaunal diversity <sup>8</sup>. The microscopic size of the  
63 organisms and the wide variety of morphologies makes the identification process  
64 tedious and slow, requiring taxonomists with experience in different groups to  
65 properly assess the composition of the community and describe new species or  
66 groups. Molecular techniques, and especially high-throughput environmental

67 sequencing (HTES), have recently provided a more efficient method to assess and  
68 understand ecological patterns in the microbial world <sup>9</sup>, including metazoans <sup>8,10–12</sup>.  
69 Although, these studies have mainly focused on richness patterns in marine benthic  
70 communities or in zooplanktonic communities, with special attention on copepods <sup>7,13</sup>.  
71 Studies of microbial eukaryotes <sup>14–16</sup> and even some animal clades <sup>17</sup> suggest that  
72 HTES could also be used to detect novel lineages. However, such an approach has yet  
73 to be applied across the whole animal kingdom.

74 To obtain a better understanding of the genetic diversity of the different metazoan  
75 phyla, and the potential of HTES to quantify diversity and novelty levels, we analyzed  
76 a large dataset of ribosomal small subunit (18S rRNA) V4 region tags from European  
77 coastal sampling sites in the context of the BioMarKs project, which was designed to  
78 analyze the diversity of unicellular eukaryotes. The BioMarKs dataset is based on 137  
79 RNA and DNA samples from six locations <sup>14,18</sup> (Fig. S1; Table S1). The use of RNA  
80 in this dataset allows analysis that goes beyond the detection of cells or DNA material  
81 in the environment, as it provides a window on biological activity. For each sampling  
82 site, there is data from both pelagic and benthic environments, with the pelagic  
83 samples being divided into different depths and size fractions (Table S2). The large  
84 quantity of data, together with the use of a phylogenetically curated taxonomic  
85 assignment has provided a global view of genetic diversity across all metazoan phyla.  
86 Our data show that 18S rRNA HTES approaches can be used to infer diversity and  
87 novelty. Furthermore, we provide evidence that many unsampled lineages remain  
88 among animals, and that there are even some potential novel groups. Consequently,  
89 greater efforts should be made to sample specific animal groups, especially in benthic  
90 environments.

91

## 92 **Results**

### 93 *Metazoan 18S rRNA reference database*

94 An important point to consider when analyzing diversity by metabarcoding is how the  
95 taxonomic assignment is done. It is known that the use of GenBank or SILVA as  
96 reference databases to perform the taxonomic assignment <sup>7,8,12,13,19,20</sup> can be  
97 problematic <sup>21</sup>. The reason is that those databases contain numerous missannotations  
98 that affect the final taxonomic assignment. To avoid this problem and to have the best  
99 possible taxonomic assignment, we manually constructed a novel phylogenetically  
100 curated metazoan 18S rRNA reference dataset.

101 Our database included 19,364 18S rRNA sequences retrieved from GenBank. The  
102 database was curated in a phylogenetic-wise manner, so that each animal phylum had  
103 the widest possible representation of internal groups and that each sequence had a  
104 clear taxonomic assignment. The resulting database was subsequently used to assign a  
105 taxonomic identity to the approximately 1.5 million reads analyzed, providing a  
106 holistic and phylogenetically accurate view of the metazoan diversity.

107

### 108 *General abundance and richness patterns of microbial animals*

109 We first analyzed the relative abundance of metazoan reads within the whole  
110 eukaryotic dataset. We found that metazoans reads were quite abundant compared to  
111 other eukaryotic groups in both the DNA and RNA samples (Fig. 1; Fig. S2). This  
112 high percentage of metazoan reads was especially notable in anoxic pelagic

113 environments and in oxic sediments (Fig.1B). Interestingly, metazoan reads were not  
114 only abundant in the micro/mesoplankton fraction (68% DNA, 49% RNA of the total  
115 eukaryotic reads), but also in the smaller fractions (i.e., the pico/nano fractions which  
116 are less than 20um). The presence of a high percentage of metazoan reads in the  
117 smaller fractions is especially relevant in the anoxic environment, with 75% of the  
118 DNA reads (and 33% of the RNA) being assigned to metazoans.

119 The clustering of reads into OTUs yielded 1067 OTUs from 23 different metazoan  
120 phyla (Fig.2, Table S4). 469 OTUs were found to be exclusive to benthic  
121 environments, 505 to pelagic environments and 102 OTUs were present in both  
122 (Fig.2A). Crustacea appeared as the richest clade (246 OTUs) within the pelagic-  
123 exclusive dataset, followed by Polychaeta (45). Within the benthic (sediment)-specific  
124 samples, the largest number of OTUs were from Nematoda (227), followed by  
125 Crustacea (101). Polychaeta (31) and Crustacea (23) dominated the OTUs present in  
126 both environments (Fig.2A).

127 The largest proportion of animal reads in oxic water column environments were from  
128 Crustacea, which represented up to the 89% of DNA and 53% of RNA in the overall  
129 metazoans reads from the micro/meso fractions (Fig. 1A). More than 80% of the  
130 crustacean RNA reads, however, corresponded to 8 specific OTUs that were assigned  
131 to copepods (Table S5). Besides crustaceans, there was also a high abundance of  
132 reads from tunicates (5% DNA only, but 28% RNA) within the oxic  
133 micro/mesoplanktonic samples, most of them corresponding to appendicularians  
134 (Table S5). On the other hand, benthic samples were dominated by polychaetes (30%  
135 DNA, 23% RNA) and crustaceans (19% DNA, 23% RNA) (Fig. 1B). Within benthic  
136 Crustacea, ostracods and copepods were the most abundant groups (Table S6).

137

138 *Community structure across environments and size fractions*

139 To determine the biogeographical patterns of the microbial animals in our dataset, we  
140 analyzed the presence/absence of OTUs in all five sites (discarding the anoxic  
141 samples). A large fraction of the OTUs (668 out of 1076) were present in just one  
142 single location. However, the number of reads of these "endemic" OTUs (around  
143  $4 \cdot 10^4$ ) was three times lower than the 8 OTUs present in all sampling sites (around  
144  $1.2 \cdot 10^5$  reads) (Fig. 2B). The taxonomic composition of the cosmopolitan OTUs (Fig.  
145 2B) differed greatly from the complete dataset except for the crustacean dominance  
146 (Fig. 2B). In particular, there were no nematodes or polychaetes among the  
147 cosmopolitan OTUs, whereas a cnidarian and a craniate OTU appeared to be present  
148 over the 5 sampling sites. Our analysis also showed that all the cosmopolitan OTUs  
149 belonged to the water column, whereas more than half (56%) of the "endemic" ones  
150 belonged to the sediments. These endemic OTUs represented 80% of the total benthic  
151 OTUs.

152 RNA reads indicate metabolically active cells<sup>22</sup>. Interestingly, we found a relatively  
153 high percentage of RNA reads assigned to metazoans in the smaller fractions (from  
154 0.8 to 20  $\mu\text{m}$ ): 2.4 % in oxic and 32.4 % in anoxic samples (Fig. 1A). Therefore, we  
155 decided to analyze the potential source of those RNA reads. Most of the reads were  
156 crustaceans (36% RNA reads), followed by tunicates, ctenophores, cnidarians and  
157 polychaetes (Fig. 1A). Ctenophores (85% RNA pico/nano fractions) and cnidarians  
158 (16% RNA pico/nano fractions) dominated the reads assigned to metazoans in the  
159 anoxic waters of Varna, Black Sea (Fig. 1B).



160 To understand whether the reads from the smaller fractions were directly derived from  
161 the larger ones, we filtered the data based on their co-occurrence between the  
162 pico/nano fraction and the micro/meso fractions. We observed that OTUs present in  
163 both smaller and larger fractions had a clearly different proportion of reads (Fig. 3).  
164 Most of the reads in the smaller fractions belonged to the ctenophores (58%), whereas  
165 crustaceans dominated (52%) the micro/mesoplanktonic fractions. In this regard,  
166 OTUs corresponding to *Pleurobrachia pileus* (a ctenophore) and *Aurelia aurita* (a  
167 cnidarian) were especially enriched in the smaller fraction (Fig. 3), representing 57%  
168 of all metazoan RNA reads, and up to 33% of all eukaryotic RNA reads in the anoxic  
169 samples (Table S7) (Fig.1A).

170

#### 171 *Sequence novelty*

172 We performed BLAST searches against the NCBI nt nr database to interrogate the  
173 level of novelty in our molecular dataset across all animal phyla. The results revealed  
174 a high degree of sequence novelty (Fig. 4A). In particular, 35.5% of our OTUs  
175 (representing 10.5% of the reads) had a BLAST identity lower than 97% compared to  
176 NCBI sequences (Fig. 4B). Moreover, up to 10% of the OTUs, which accounts for 5%  
177 of the metazoan reads, had BLAST identities lower than 90%. The putative novelty  
178 was especially high among platyhelminthes, acoelomorphs, and nematodes, in which  
179 most of their OTUs (75%) had a BLAST identity lower than 97%. Gastrotrichs and  
180 crustaceans also had significant novelty (40-50% of their OTUs had a BLAST identity  
181 below 97%).

182 Interestingly, the OTUs that appear to be most abundant within the water column  
183 (Table S5) and sediments (Table S6) correspond either to already known sequences or

184 with high similarity to known sequences. The level of novelty is also different  
185 between benthic and pelagic environments. Thus, 70% of the OTUs found in benthic  
186 environments had a BLAST identity of less than 97% (Fig. 2A), while this percentage  
187 decreased to 21% of OTUs in the water column or to 11% of OTUs present in both  
188 water column and benthos. This suggests that benthic marine environments are a  
189 potential hot-spot to find new metazoan taxa or lineages.

190 Among the potential novelty, we detected a group of three OTUs that had a relatively  
191 large number of RNA reads in the water column (1.8%). (Fig. 1, labelled as "MAME  
192 1"; MArine METazoan group 1), and with BLAST identities around 95% against two  
193 unclassified environmental sequences from GenBank (KC582969 and HQ869055).  
194 Analysis of this group of OTUs in other HTES studies based on the 18S rDNA gene  
195 revealed 66 more OTUs retrieved from SRA (14 OTUs) and Tara Oceans<sup>9</sup> (52 OTUs)  
196 that are potentially from the same MAME 1 clade. Those 69 OTUs from BioMarks,  
197 SRA and Tara Oceans represent 389,703 reads in total, an indication that OTUs  
198 assigned to this group are relatively common in marine environments. Indeed, we  
199 found that MAME 1 was present in coastal and open waters with a widespread  
200 distribution across the world's oceans (except for the Arctic) in both the surface and  
201 the deep chlorophyll maximum (Fig. S5B).

202 To have a better understanding of its phylogenetic position, we performed  
203 phylogenetic trees. Our trees placed the MAME 1 GenBank sequence within tunicates  
204 by both maximum likelihood and Bayesian inference (Table S3), and with good nodal  
205 support (79% bootstrap support and 0.99 Bayesian posterior probability), although  
206 with relatively longer branches than the rest of the metazoans. To determine its  
207 specific phylogenetic position within the tunicates, we inferred an additional tree with

208 most of the available 18S rRNA sequences of tunicates, representing most of the  
209 known diversity of this phylum. In this tunicate-focused tree, the MAME 1 sequence  
210 clustered with thaliaceans as sister-group to the genus *Doliolum*, although with low  
211 nodal support (Fig. 5). Finally, we ran a RAxML-EPA analysis to place the 69 OTUs  
212 plus the other NCBI sequence within the reference tree of metazoans and the tree of  
213 tunicates. In both cases, the 69 OTUs clustered together, with the reference MAME 1  
214 sequences forming a monophyletic clade. Thus, our phylogenetic analysis suggests  
215 that MAME 1 represents a novel, previously undescribed group of tunicates. Given  
216 their extremely long-branches, however, additional molecular data will be needed to  
217 further confirm this relationship.

218

## 219 **Discussion**

### 220 *High-throughput sequencing, a powerful methodology to assess diversity*

221 HTES is a useful method, but it also has some caveats. For example, it is well known  
222 that it may be misleading to directly translate reads and OTU numbers into biomass  
223 and number of species, respectively. In particular, the use of amplicon data as a proxy  
224 for metazoan biomass abundance has been disputed, also with RNA data<sup>23</sup>. Different  
225 number of rRNA copies in the genomes of different taxa, PCR primer mismatches and  
226 amplicon lengths can all affect the correlation between morphological and molecular  
227 data<sup>7,24</sup>. However, some studies have indeed shown positive correlations between  
228 read abundances and biomass patterns in bivalve and decapod larvae<sup>19</sup> and within  
229 copepod groups<sup>7</sup>. Thus, we believe our approach to biomass abundance, although not  
230 perfect, is useful enough to report the most abundant groups. A good indication of our  
231 approach is that we recovered the general patterns previously described in

232 micro/mesoplanktonic communities based on morphological observations <sup>25,26</sup>, in  
233 which copepods were found to be predominant within micro/mesoplanktonic  
234 communities <sup>6</sup> followed by appendicularians <sup>26</sup>. Moreover, we found a more  
235 heterogenic distribution in benthic habitats, which is to be expected considering that  
236 sediments are known to harbor most of the metazoan diversity <sup>5</sup>.

237 Overall, our data confirms that, although with some caveats, HTES is a powerful tool  
238 to assess diversity. In this regard, the construction of a phylogenetically curated  
239 database to assign the OTU taxonomy has proven to be crucial for our analysis aimed  
240 at describing novelty in different metazoan phyla. Our clustering of OTUs at 97% is  
241 likely a conservative approach for metazoans <sup>27</sup>, and some of our OTUs may indeed  
242 represent more than one species. This largely depends on each metazoan lineage and  
243 its specific 18S rRNA evolution rate. Moreover, primer bias can affect the detection  
244 of some groups, meaning that some taxa can be present in the environment but  
245 missing in our dataset <sup>28</sup>. However, by clustering at 97% we can directly compare the  
246 results with the rest of the eukaryotes and get a more stringent output avoiding  
247 polymorphisms effects and an overrepresentation of the retrieved diversity.

248

#### 249 *Benthic-Pelagic relationship*

250 Analysis of benthic and pelagic metazoan communities in our dataset revealed that  
251 most OTUs are exclusively pelagic or benthic, showing few overlaps between the two  
252 communities, in agreement with our beta-diversity analyses (Fig. S3, Fig. S4A) and  
253 the literature available <sup>29,30</sup>. Only 10% of OTUs from our dataset were present in both  
254 benthic and pelagic communities, and these mainly corresponded to polychaetes,  
255 crustaceans, molluscs and cnidarians (Fig. 2A). Among the shared OTUs Polychaeta

256 and Mollusca water column reads probably represent juvenile pelagic stages<sup>31,32</sup>

257 while the benthic reads from crustaceans and cnidarians, that are predominantly

258 pelagic, come likely from death organisms or debris.

259 In addition, our data clearly shows that the pelagic OTUs tend to be present in more

260 sites, while most of the benthic OTUs are restricted to one location. The restricted

261 presence of meiofaunal OTUs has been described previously<sup>20</sup>. Thus, the distribution

262 in the water column fits more with the consideration that “everything is everywhere”

263<sup>33</sup>, probably because pelagic animals have fewer dispersal barriers than do benthic

264 ones<sup>34</sup>.

265

266 *An ecological role for gametes?*

267 Somewhat surprisingly, we observed a high percentage of metazoan reads in the

268 smaller size fractions of most water column samples (Figure 1). This includes, as

269 well, the samples derived from RNA templates, probably indicating a significant

270 biological activity of metazoans in those smaller fractions. We believe it is unlikely

271 that those metazoan RNA reads could come from an extracellular origin because RNA

272 is fragile and quickly degraded by ribonucleases, and its structure is easily affected by

273 both oxygen and water<sup>35</sup>. Furthermore, the RNA reads from pico/nanoplanktonic

274 fractions contain a different taxonomic distribution compared to the extracellular

275 DNA samples and the micro/mesoplanktonic RNA samples (Fig. 1A and Fig. 3A).

276 Thus, and taking into account the small size reported for certain animal gametes, we

277 hypothesize that a large part of those metazoan reads from the smaller fractions most

278 likely come from metazoan gametes.

279 This is the case, for example, of the reads from smaller fractions assigned to tunicates,  
280 ctenophores, cnidarians and polychaetes, since they all use external fertilization.  
281 Ctenophora and Cnidaria, which are not only abundant in DNA reads but also have a  
282 relatively high number of RNA reads in the smaller fractions (Fig. 3B), might be a  
283 particularly notable example of the importance of gametes in the environment. The  
284 co-occurrence of reads in both smaller and larger fractions, the overrepresentation in  
285 the smaller ones and the fact that their sperm size is smaller than  $5\ \mu\text{m}$ <sup>36,37</sup> are good  
286 indicators that at least the RNA signal of cnidarians and ctenophores might  
287 corresponds to gametes. That will not be the case for the reads assigned to copepods  
288 in the smaller fractions. They cannot come from gametes, since copepods use internal  
289 fertilization and release eggs larger than  $50\ \mu\text{m}$ <sup>38</sup>. Therefore, the crustacean RNA  
290 reads observed in smaller fractions (from  $0.8$  to  $20\ \mu\text{m}$ ) are probably the result of cell  
291 breakage from larger fractions (Fig. 3A). Finally, we note that some of the OTUs that  
292 are exclusively retrieved from smaller fractions could also correspond to sperm from  
293 organisms that are larger than  $2\text{mm}$  or from benthic fauna with external fertilization  
294 and gamete sizes less than  $10\ \mu\text{m}$ , such as certain ctenophores and polychaetes (Table  
295 S7).

296 It is worth mentioning that metazoan RNA reads corresponding to germline cells  
297 could account, in our data, for as much as 3.2% of the total eukaryotic RNA reads in  
298 the smaller fractions (Table S7), and up to 33% of eukaryotic reads in anoxic samples.  
299 Thus, their numbers are comparable to those from the unicellular heterotrophic  
300 flagellates, which usually reach abundances of up to the 40% of eukaryotic RNA  
301 reads in pico and nano plankton<sup>39</sup>. Thus, and considering those abundances, sperm  
302 may play an important ecological role in those environments, particularly in the Black  
303 Sea anoxic waters. Further research is needed to assess the effect of sperm in

304 microbial nutrient fluxes, especially during spawning events, when it may represent a  
305 passive member of the community eaten by other metazoans or protists from micro-  
306 scale fractions.

307

### 308 *Novelty in different metazoan phyla*

309 We performed an analysis on novelty by plotting the pairwise identities of the first  
310 BLAST hit against NCBI non-redundant database. This provided a distribution of the  
311 "novel" OTUs (those with sequence identities lower than 97% to any NCBI sequence)  
312 along different environments (Fig. 2) and for different metazoan phyla (Fig. 4).  
313 Interestingly, we found that 45% of our metazoan OTUs had less than 97% identity  
314 against the NCBI nt nr database. Why a threshold of 97% for novelty? We believe it  
315 is the safest one to detect novelty, although we probably miss a lot of intra-genera or  
316 intra-class variation, depending in the animal group. It is worth mentioning, however,  
317 that by having a threshold of pair-wise identities below 97%, we avoid any potential  
318 intra-individual polymorphic variants<sup>40</sup>. Therefore, we follow the rationale that OTUs  
319 that do not have 100% identities but close (98% or higher) against the first BLAST hit  
320 from NCBI non-redundant database, are probably the same taxa (maybe representing  
321 intraindividual variations) or very closely related species. In contrast, the OTUs that  
322 have a BLAST identity under 97% represent much deeper changes, and so, they  
323 clearly represent, at least, different taxa than the ones represented in Genbank. Some  
324 OTUs, especially those 10% of our OTUs with pairwise identities against GenBank  
325 under 90%, may even represent new clades.

326 Although one could argue that this degree of novelty might reflect sequencing  
327 artifacts, we are confident it is not the case because 1) we have followed a stringent

328 chimera and singletons removal process, 2) the reads are distributed across different  
329 samples, and 3) they are not homogeneously distributed among taxonomic groups. In  
330 addition, around 80% of our OTUs have RNA reads and their taxonomic distribution  
331 is almost identical to the DNA OTUs. So, these novel variants present in the RNA  
332 subset are transcribed by active organisms and are less prone to be artifacts or rare  
333 variants <sup>41</sup>.

334 We are aware that detection of novelty in metazoans just with molecular data is  
335 challenging, given that the number of described animal species is larger than the  
336 number of 18S rRNA sequences available in public databases (Fig. S7B). Therefore, a  
337 novel sequence might belong to a species that has already been described but not yet  
338 sequenced. A complete database linking morphological and molecular data is needed  
339 to fully solve this issue. However, the 18S rRNA data so far available certainly is a  
340 good representation of known animal diversity (Fig. S7B), and we believe our study  
341 does indicate which metazoan lineages contain the higher levels of hidden molecular  
342 diversity, and so, which are the animal groups needed for a more extensive sampling.

343 Those animal groups with the higher levels of novelty are not others than crustaceans,  
344 nematodes, platyhelminthes, gastrotrichs and acoelomorphs. With the exception of  
345 crustaceans, these groups occupy early branching phylogenetic positions within the  
346 Ecdysozoa or the Lophotrochoa/Spiralia, or even within the Bilateria <sup>42</sup>. Moreover,  
347 the high genetic diversity in often neglected groups such as Acoelomorpha <sup>17</sup> and  
348 Gastrotricha <sup>10</sup> reveals that these groups need a deeper exploration. We cannot rule  
349 out the possibility that the relatively fast evolutionary rates of the 18S sequences from  
350 nematodes, acoelomorphs and chaetognaths may have an effect on these low  
351 similarity values. In addition, intragenomic variability of the 18S rRNA gene, already



352 described in some metazoan groups such as Platyhelminthes<sup>43</sup> or Chaetognaths<sup>44</sup>,  
353 can also contribute to these novelty values. Nevertheless, those are specific, isolated  
354 cases. There is certainly extensive genetic novelty in our dataset, suggesting that most  
355 acoelomorph, platyhelminth, chaetognath, and nematode species have not yet been  
356 sequenced. Some of these hidden animal OTUs occupy key phylogenetic positions,  
357 which can help to better reconstruct the metazoan tree of life and unravel the  
358 evolution of extant species from the Urmetazoan<sup>17</sup>.

359

### 360 *A potential novel group of tunicates revealed by HTES*

361 We also recovered and genetically described a potential novel group of tunicates, here  
362 named as “MAME 1”. It could be argued that this group represents an already  
363 described Thaliacean related to the genus *Doliolum* that happens to have never been  
364 sequenced or rare variants of the 18S gene belonging to known species. However, we  
365 consider these two options unlikely for several reasons. First, the group seems to be  
366 well populated (69 OTUs between our data and public repositories) and present in  
367 many environments worldwide, not only in coastal waters (Fig. S5). Moreover, the  
368 pairwise identity of the two MAME 1 sequences retrieved from NCBI is about 89%,  
369 suggesting is not a single species, but rather an entire group of sequences with high  
370 genetic variability, forming an independent clade related to Thaliaceans (Fig. 5). In  
371 fact, the nucleotide identity among MAME 1 OTUs is similar as the observed among  
372 distant *Aplousobranchia* species (for example, there is an 88% of identity between the  
373 18S rRNA of *Distaplia dubia* and *Diplosoma virens*). Finally, different classes of the  
374 18S rRNA gene have not been reported yet in Tunicates (there are 628 tunicate 18S  
375 ribosomal sequences available at Genbank) and the percentage of identity of MAME

376 1 sequences against described Tunicate species seems too low (78% of identity with  
377 the best BLAST hit *Thalia democratica*) for a different 18S rRNA type. In animal  
378 groups in which different classes of 18S rRNA gene have been described, such as in  
379 chaetognaths, the intra-individual variation among 18S classes lies around 90-93% of  
380 identity<sup>44</sup>. Therefore, we suggest that MAME 1 might corresponds to a new group of  
381 tunicates that contains a large number of RNA reads within micro/mesoplankton  
382 environments and is present in different habitats. However, without morphological  
383 data, we cannot truly discard the possibility that those sequences belong to a  
384 molecular divergent group of Thaliacean species, already morphologically described,  
385 but without genetic data available. Although this emphasizes the powerful of HTES to  
386 assess biodiversity and detect novelty, it also highlights its limitations. Thus, it is  
387 crucial to continue and improve the classical screenings of marine diversity, with the  
388 aim to link altogether morphological and genetic information in order to better  
389 understand the metazoan biodiversity of our oceans.

## 390 **Conclusions**

391 We have reported an analysis of micrometazoan diversity in the European coast based  
392 on HTES that includes, for the first time, both water column and sediments, oxic and  
393 anoxic environments, and both DNA and RNA templates. To assess taxonomy, we  
394 constructed a novel reference dataset comprising all animal phyla, which was  
395 manually and phylogenetically curated. Our data show general read abundance and  
396 richness patterns that partially corroborate previous morphological<sup>5,6,25,26</sup> and  
397 molecular studies<sup>8,10,13,19,20,45</sup>. Our data showed a high relative abundance of  
398 metazoan RNA reads within pico-nano size fractions (0.8-20  $\mu\text{m}$ ), suggesting that the  
399 sperm of Ctenophores and Cnidarians plays a relevant ecological role as part of the

400 microbial food network. These results show the potential of HTES techniques as a fast  
401 and exhaustive method to approach the study of micrometazoan biomass and diversity  
402 patterns.

403 This kind of data has allowed us to describe novelty values found in different animal  
404 phyla. We observed that some animal phyla have much genetic novelty that is yet to  
405 be unraveled, including novelty in several well sampled groups such as Crustacea,  
406 Platyhelminthes or Nematoda. Our finding of a potential new group of widespread  
407 tunicates (MAME 1) highlights the value of phylogenetic approaches to identify novel  
408 groups within phyla. The finding of MAME 1 in several HTES datasets could be  
409 considered the first step in a reverse taxonomic process <sup>46</sup> potentially leading to  
410 isolation and detailed description. Overall, our data show that, if we truly want to  
411 understand the biodiversity of marine environments, it is important to further sample  
412 animal taxa within those environments. To achieve that, we need to have better tools  
413 for the genetic screening, and especially for the isolation and morphological  
414 characterization of these organisms.

## 415 **Materials and Methods**

### 416 *Sampling, 454 sequencing, curation of the sequences and diversity analysis*

417 During the BioMarKs project (biomarks.eu), samples were collected in six European  
418 coastal sites (Fig. S1; Table S1). For sampling collection details, DNA/RNA  
419 extraction methods, PCR amplifications, 454 sequencing details and read filtering  
420 process see the electronic supplementary material. Processed reads allowed to build a  
421 OTU (Operational Taxonomic Unit) table (reads per sample) with usearch v8.1.861 <sup>47</sup>,  
422 using the UPARSE OTU clustering algorithm <sup>48</sup>, at a threshold of 97% similarity.  
423 Afterwards, we used our own metazoan reference dataset (available at figshare

424 <https://dx.doi.org/10.6084/m9.figshare.3475007.v1>) to assign a taxonomical  
425 affiliation to our OTUs. Finally, we removed the putative chimeric metazoan  
426 sequences using Mothur's Chimera Slayer<sup>49</sup> and discarded all the singletons. We  
427 determined the degree of novelty of our dataset, by blasting the OTU sequences  
428 against NCBI nt nr (September 23 2014). The metazoan OTU table obtained was  
429 processed for alpha and beta-diversity analyses using QIIME<sup>50</sup>. See the electronic  
430 supplementary material for details on this section.

#### 431 *Analysis of the RNA reads from the small fractions*

432 Using QIIME scripts, we binned the OTUs that contain RNA reads within the water  
433 column of each sampling site into three different groups: 1) OTUs containing the  
434 small fractions (pico/nano), 2) OTUs containing the larger fraction (micro/meso), and  
435 3) OTUs present in both small and large size classes. OTUs representing less than 10  
436 RNA reads per site were discarded.

#### 437 *Phylogenetic analysis of MAME1 sequence tags*

438 In order to phylogenetically place the short reads assigned to the novel metazoan  
439 group (MAME 1) within an animal and tunicate backbone, we performed a RAxML-  
440 EPA analysis<sup>51</sup> using a metazoan and a tunicate reference tree using the longest  
441 putative MAME 1 sequence found by BLAST at NCBI nt nr database (*KC582969*), as  
442 a unique MAME 1 representative. Using the MAME1 tree and alignment as a  
443 reference we recruited environmental 18S rDNA short reads from SRA and Tara  
444 Oceans and used them to perform abundance and distribution analyses (see the  
445 electronic supplementary material).

446

447 **Data accessibility**

448

449 Electronic supplementary material that accompanies the online version of this article  
450 includes materials and methods and supplementary figures and tables. The complete  
451 BioMarks sequencing dataset is available at European Nucleotide Archive (EMBL-  
452 EBI) <http://www.ebi.ac.uk/ena>, under project accession number PRJEB9133. OTU  
453 tables, 18S metazoan database, MAME 1 group OTU table and phylogenetic trees  
454 data (alignments, sequences and trees) are available at Figshare:  
455 <https://dx.doi.org/10.6084/m9.figshare.3475007.v1>.

456

457 **Acknowledgment**

458 This work was supported by an Institució Catalana de Recerca i Estudis Avançats  
459 contract, two grants (BFU-2011-23434 and BFU2014-57779-P) from the Ministerio de  
460 Economía y Competitividad (MINECO), one of which (BFU2014-57779-P) was co-  
461 funded by the European Regional Development Fund (FEDER), and a European  
462 Research Council Consolidator Grant (ERC-2012-Co -616960) to IR-T. We also  
463 acknowledge financial support from the Secretaria d'Universitats i Recerca del  
464 Departament d'Economia i Coneixement de la Generalitat de Catalunya (Project 2014  
465 SGR 619). JdC is supported by a Marie Curie International Outgoing Fellowship grant  
466 (FP7-PEOPLE-2012-IOF - 331450 CAARL). JP acknowledges support from the  
467 European Research Council under the European Union's Seventh Framework Program  
468 (FP7/2007- 2013) / ERC grant [268513]. The work is part of the EU ERA-Net program  
469 BiodivERsA, under the project BioMarKs (Biodiversity of Marine euKaryotes).

470

471 **Author Contributions**

472 JdC and IR-T designed and coordinated the study. RM and CdV provided the data. DL-  
473 E, JdC and JP prepared the 18S metazoan database. DL-E and JdC analyzed the data  
474 and prepared the figures. DL-E, JdC, JP and IR-T interpreted the data. DL-E, JdC and  
475 IR-T wrote the manuscript, while all authors commented the manuscript.

476

477 **Additional Information**

478 Competing financial interests: The authors declare no competing financial interests

479

480 **References**

- 481 1. del Campo, J. *et al.* The others: our biased perspective of eukaryotic genomes.  
482 *Trends Ecol. Evol.* **29**, 252–259 (2014).
- 483 2. Zhang, Z.-Q. Q. Animal biodiversity: An update of classification and diversity  
484 in 2013. *Zootaxa* **3703**, 5 (2013).
- 485 3. Blaxter, M. L. *et al.* Defining operational taxonomic units using DNA barcode  
486 data. *Philos. Trans. R. Soc. B Biol. Sci.* **360**, 1935–1943 (2005).
- 487 4. Guil, N. Molecular approach to micrometazoans. Are they here, there and  
488 everywhere? in *Biogeography of Microscopic Organisms* (ed. Fontaneto, D.)  
489 284–306 (Cambridge University Press, 2011).  
490 doi:10.1017/CBO9781107415324.004
- 491 5. Snelgrove, P. V. R. Getting to the bottom of marine biodiversity: sedimentary  
492 habitats. *Bioscience* **49**, 129 (1999).
- 493 6. Humes, A. How many copepods? *Hydrobiologia* **292/293**, 1–7 (1994).
- 494 7. Hirai, J., Kuriyama, M., Ichikawa, T., Hidaka, K. & Tsuda, A. A metagenetic  
495 approach for revealing community structure of marine planktonic copepods.  
496 *Mol. Ecol. Resour.* **15**, 68–80 (2015).
- 497 8. Fonseca, V. G. *et al.* Second-generation environmental sequencing unmask  
498 marine metazoan biodiversity. *Nat. Commun.* **1**, 98 (2010).
- 499 9. de Vargas, C. *et al.* Eukaryotic plankton diversity in the sunlit ocean. *Science*  
500 **348**, 1261605–1261605 (2015).
- 501 10. Chariton, A. A., Court, L. N., Hartley, D. M., Colloff, M. J. & Hardy, C. M.  
502 Ecological assessment of estuarine sediments by pyrosequencing eukaryotic  
503 ribosomal DNA. *Front. Ecol. Environ.* **8**, 233–238 (2010).
- 504 11. Lallias, D. *et al.* Environmental metabarcoding reveals heterogeneous drivers  
505 of microbial eukaryote diversity in contrasting estuarine ecosystems. *ISME J.*  
506 **9**, 1208–1221 (2015).
- 507 12. Bik, H. M. *et al.* Metagenetic community analysis of microbial eukaryotes  
508 illuminates biogeographic patterns in deep-sea and shallow water sediments.  
509 *Mol. Ecol.* **21**, 1048–1059 (2012).
- 510 13. Pearman, J. K., El-Sherbiny, M. M., Lanzén, A., Al-Aidaros, A. M. &  
511 Irigoien, X. Zooplankton diversity across three Red Sea reefs using  
512 pyrosequencing. *Front. Mar. Sci.* **1**, 1–11 (2014).
- 513 14. del Campo, J. *et al.* Diversity and distribution of unicellular opisthokonts along  
514 the European coast analysed using high-throughput sequencing. *Environ.*  
515 *Microbiol.* **17**, 3195–3207 (2015).

- 516 15. Richards, T. A. *et al.* Molecular diversity and distribution of marine fungi  
517 across 130 European environmental samples. *Proc. R. Soc. B Biol. Sci.* **282**,  
518 20152243–20152243 (2015).
- 519 16. Pan, J., del Campo, J. & Keeling, P. J. Reference Tree and Environmental  
520 Sequence Diversity of Labyrinthulomycetes. *J. Eukaryot. Microbiol.* **64**, 88–96  
521 (2017).
- 522 17. Arroyo, A. S., López-Escardó, D., de Vargas, C. & Ruiz-Trillo, I. Hidden  
523 diversity of Acoelomorpha revealed through metabarcoding. *Biol. Lett.* **12**,  
524 20160674 (2016).
- 525 18. Massana, R. *et al.* Marine protist diversity in European coastal waters and  
526 sediments as revealed by high-throughput sequencing. *Environ. Microbiol.* **17**,  
527 4035–4049 (2015).
- 528 19. Lindeque, P. K., Parry, H. E., Harmer, R. a, Somerfield, P. J. & Atkinson, A.  
529 Next generation sequencing reveals the hidden diversity of zooplankton  
530 assemblages. *PLoS One* **8**, e81327 (2013).
- 531 20. Fonseca, V. G. *et al.* Metagenetic analysis of patterns of distribution and  
532 diversity of marine meiobenthic eukaryotes. *Glob. Ecol. Biogeogr.* **23**, 1293–  
533 1302 (2014).
- 534 21. Bik, H. M. *et al.* Sequencing our way towards understanding global eukaryotic  
535 biodiversity. *Trends Ecol. Evol.* **27**, 233–43 (2012).
- 536 22. Felske, A. *et al.* Phylogeny of the Main Bacterial 16S rRNA Sequences in  
537 Drentse A Grassland Soils. *Appl. Environ. Microbiol.* **64**, 871–879 (1998).
- 538 23. Lejzerowicz, F. *et al.* High-throughput sequencing and morphology perform  
539 equally well for benthic monitoring of marine ecosystems. *Sci. Rep.* **5**, 13932  
540 (2015).
- 541 24. Porazinska, D. L., Sung, W., Giblin-Davis, R. M. & Thomas, W. K.  
542 Reproducibility of read numbers in high-throughput sequencing analysis of  
543 nematode community composition and structure. *Mol. Ecol. Resour.* **10**, 666–  
544 676 (2010).
- 545 25. Beaugrand, G., Brander, K. M., Alistair Lindley, J., Souissi, S. & Reid, P. C.  
546 Plankton effect on cod recruitment in the North Sea. *Nature* **426**, 661–664  
547 (2003).
- 548 26. Bouquet, J.-M. *et al.* Culture optimization for the emergent zooplanktonic  
549 model organism *Oikopleura dioica*. *J. Plankton Res.* **31**, 359–370 (2009).
- 550 27. Tang, C. Q. *et al.* The widely used small subunit 18S rDNA molecule greatly  
551 underestimates true diversity in biodiversity surveys of the meiofauna.  
552 *Proceedings of the National Academy of Sciences* **109**, 16208–16212 (2012).



- 553 28. Creer, S. *et al.* Ultrasequencing of the meiofaunal biosphere: Practice, pitfalls  
554 and promises. *Mol. Ecol.* **19**, 4–20 (2010).
- 555 29. Johnson, C. L. *et al.* Biodiversity and ecosystem function in the Gulf of Maine:  
556 pattern and role of zooplankton and pelagic nekton. *PLoS One* **6**, e16491  
557 (2011).
- 558 30. Giere, O. *Meiobenthology: the microscopic motile fauna of aquatic sediments.*  
559 *Meiobenthology* (Springer-Verlag Berlin Heidelberg, 2008).
- 560 31. Ellien, C., Thiébaud, E., Dumas, F., Salomon, J.-C. & Nival, P. A modelling  
561 study of the respective role of hydrodynamic processes and larval mortality on  
562 larval dispersal and recruitment of benthic invertebrates: example of *Pectinaria*  
563 *koreni* (Annelida: Polychaeta) in the Bay of Seine (English Channel). *J.*  
564 *Plankton Res.* **26**, 117–132 (2004).
- 565 32. Andresen, H., Strasser, M. & van der Meer, J. Estimation of Density-  
566 Dependent Mortality of Juvenile Bivalves in the Wadden Sea. *PLoS One* **9**,  
567 e102491 (2014).
- 568 33. Beaugrand, G., Reid, P. C., Ibañez, F., Lindley, J. A. & Edwards, M.  
569 Reorganization of North Atlantic marine copepod biodiversity and climate.  
570 *Science* **296**, 1692–1694 (2002).
- 571 34. Thornhill, D. J., Mahon, A. R., Norenburg, J. L. & Halanych, K. M. Open-  
572 ocean barriers to dispersal: A test case with the Antarctic Polar Front and the  
573 ribbon worm *Parborlasia corrugatus* (Nemertea: Lineidae). *Mol. Ecol.* **17**,  
574 5104–5117 (2008).
- 575 35. Lindahl, T. Instability and decay of the primary structure of DNA. *Nature* **362**,  
576 709–715 (1993).
- 577 36. Gaino, E. & Scoccia, F. Sperm ultrastructure of a member of the black coral  
578 family Aphanipathidae: *Rhipidipathes reticulata* (Anthozoa, Antipatharia).  
579 *Tissue Cell* **42**, 391–394 (2010).
- 580 37. Fischer, A. H., Pang, K., Henry, J. Q. & Martindale, M. Q. A cleavage clock  
581 regulates features of lineage-specific differentiation in the development of a  
582 basal branching metazoan, the ctenophore *Mnemiopsis leidyi*. *Evodevo* **5**, 4  
583 (2014).
- 584 38. Castellani, C. & Lucas, I. A. N. Seasonal variation in egg morphology and  
585 hatching success in the calanoid copepods *Temora longicornis*, *Acartia clausi*  
586 and *Centropages hamatus*. *J. Plankton Res.* **25**, 527–537 (2003).
- 587 39. Logares, R. *et al.* Diversity patterns and activity of uncultured marine  
588 heterotrophic flagellates unveiled with pyrosequencing. *ISME J.* **6**, 1823–1833  
589 (2012).
- 590 40. Stoeck, T. *et al.* Multiple marker parallel tag environmental DNA sequencing

- 591 reveals a highly complex eukaryotic community in marine anoxic water. *Mol.*  
592 *Ecol.* **19**, 21–31 (2010).
- 593 41. Pawlowski, J., Esling, P., Lejzerowicz, F., Cedhagen, T. & Wilding, T. A.  
594 Environmental monitoring through protist next-generation sequencing  
595 metabarcoding: Assessing the impact of fish farming on benthic foraminifera  
596 communities. *Mol. Ecol. Resour.* **14**, 1129–1140 (2014).
- 597 42. Telford, M. J., Budd, G. E. & Philippe, H. Phylogenomic insights into animal  
598 evolution. *Current Biology : CB* **25**, (2015).
- 599 43. Carranza, S., Giribet, G., Ribera, C., Bagueña, J. & Riutort, M. Evidence that  
600 two types of 18S rDNA coexist in the genome of *Dugesia* (Schmidtea)  
601 mediterranea (Platyhelminthes, Turbellaria, Tricladida). *Mol. Biol. Evol.* **13**,  
602 824–832 (1996).
- 603 44. Gasmi, S. *et al.* Evolutionary history of Chaetognatha inferred from molecular  
604 and morphological data: a case study for body plan simplification. *Front. Zool.*  
605 **11**, 84 (2014).
- 606 45. Pearman, J. K. & Irigoien, X. Assessment of Zooplankton Community  
607 Composition along a Depth Profile in the Central Red Sea. *PLoS One* **10**,  
608 e0133487 (2015).
- 609 46. Markmann, M. & Tautz, D. Reverse taxonomy: an approach towards  
610 determining the diversity of meiobenthic organisms based on ribosomal RNA  
611 signature sequences. *Philos. Trans. R. Soc. B Biol. Sci.* **360**, 1917–1924 (2005).
- 612 47. Edgar, R. C. Search and clustering orders of magnitude faster than BLAST.  
613 *Bioinformatics* **26**, 2460–2461 (2010).
- 614 48. Edgar, R. C. UPARSE: highly accurate OTU sequences from microbial  
615 amplicon reads. *Nat. Methods* **10**, (2013).
- 616 49. Schloss, P. D. *et al.* Introducing mothur: Open-source, platform-independent,  
617 community-supported software for describing and comparing microbial  
618 communities. *Appl. Environ. Microbiol.* **75**, 7537–7541 (2009).
- 619 50. Caporaso, J. G. *et al.* QIIME allows analysis of high-throughput community  
620 sequencing data. *Nat. Methods* **7**, 335–336 (2010).
- 621 51. Berger, S. A., Krompass, D. & Stamatakis, A. Performance, accuracy, and Web  
622 server for evolutionary placement of short sequence reads under maximum  
623 likelihood. *Syst. Biol.* **60**, 291–302 (2011).
- 624

## 625 **Figure Legends**

626 **Fig. 1: Relative abundances of different metazoan groups and metazoan relative**  
627 **abundance compared to the eukaryotes.** Relative abundances of different metazoan  
628 groups (colored columns) and metazoan relative abundance compared to total  
629 eukaryotes (black columns) in **(a)** oxic fractions and anoxic fractions, and **(b)**  
630 different depths, separated by DNA and RNA templates. The number above each  
631 column represents the number of metazoan reads in the fraction/environment for the  
632 given template (RNA or DNA).

633 **Fig. 2: Metazoan richness.** **(a)** The OTU distribution for each metazoan group  
634 divided into pelagic specific, sediment specific and those present in both  
635 environments. BLAST identities are also plotted against NCBI nr nt in dark/light blue.  
636 On the right, there is a representation of the number of OTUs (blue line) and number  
637 of reads (red line) based on their environment. **(b)** Environmental distribution of  
638 OTUs is shown based on prevalence: In blue, pelagic-specific OTUs (i.e., OTU with  
639 more than 90% of the reads within the water column); in green, OTUs present both in  
640 the water column and the sediments; in brown, OTUs present only in sediments (i.e.,  
641 OTUs with more than 90% of the reads within the sediments). In addition, BLAST  
642 identities are shown against NCBI nr nt in dark/light blue. The number of OTUs (blue  
643 line) and number of reads (red line) based on their occurrence in 1 or more (up to 5)  
644 geographical site is shown to the right.

645 **Fig. 3: Analysis of the small (pico and nano) and large (micro/meso) fractions,**  
646 **and extracellular DNA.** **(a)** Taxonomic distribution of the OTU reads in the smaller  
647 and larger fractions and within the extracellular DNA. **(b)** Ratio of the numbers of  
648 reads from the smaller fractions and large fraction for these OTUs.

649 **Fig. 4: Sequence novelty plus summary of OTUs/read numbers of the main**  
650 **Metazoan phyla in our dataset.** **(a)** Distribution of OTU BLAST identities against  
651 NCBI nt nr for the main phyla of our dataset. **(b)** Summary of the number of OTUs  
652 (blue) and the number of reads (red) of the given phyla.

653 **Fig. 5: Tunicate 18S rRNA phylogenetic tree placing the novel metazoan group**  
654 **MAME 1.** The tree was inferred using RaxML-EPA from the 18S rRNA gene  
655 nucleotide sequence and including representatives from all sequenced tunicate groups.  
656 The nodal support values marked with a dot correspond to maximum likelihood 100-  
657 replicate bootstrap support and Bayesian posterior probabilities.

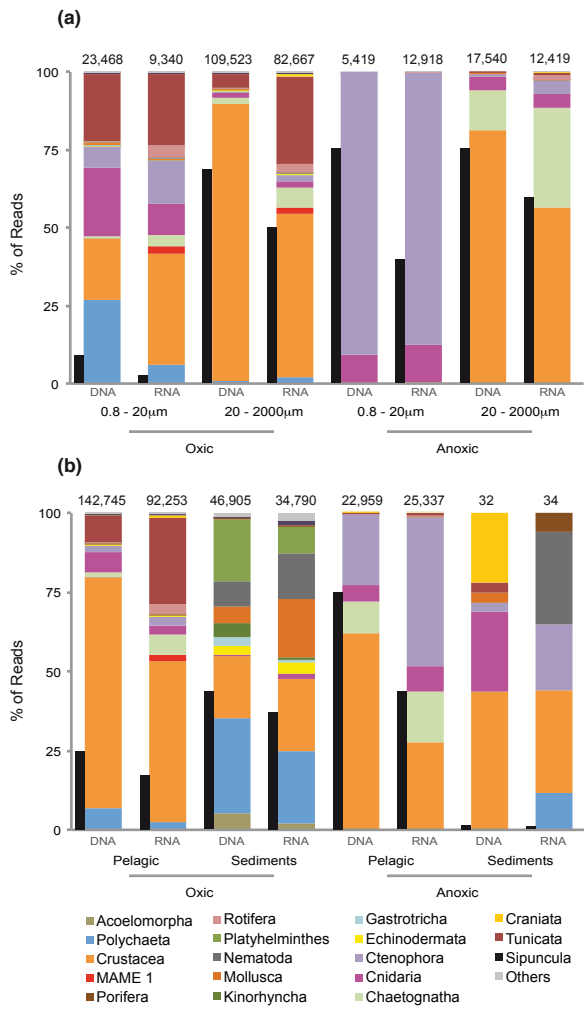

Fig 1

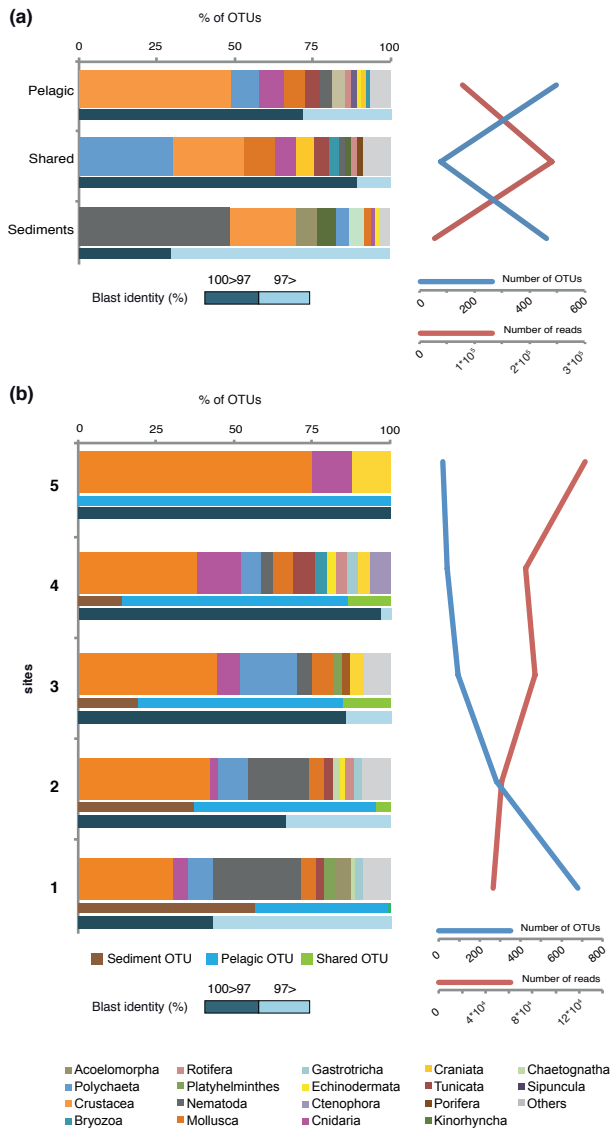

Fig 2

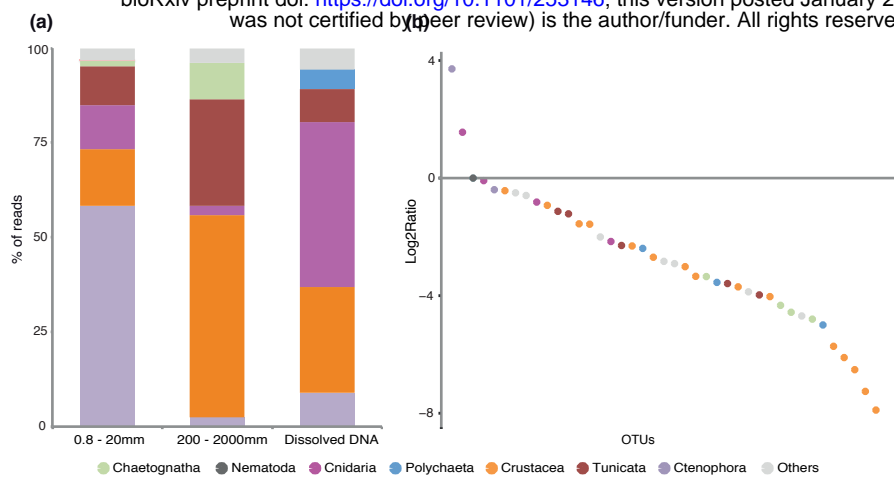

Fig 3

(a)

(b)

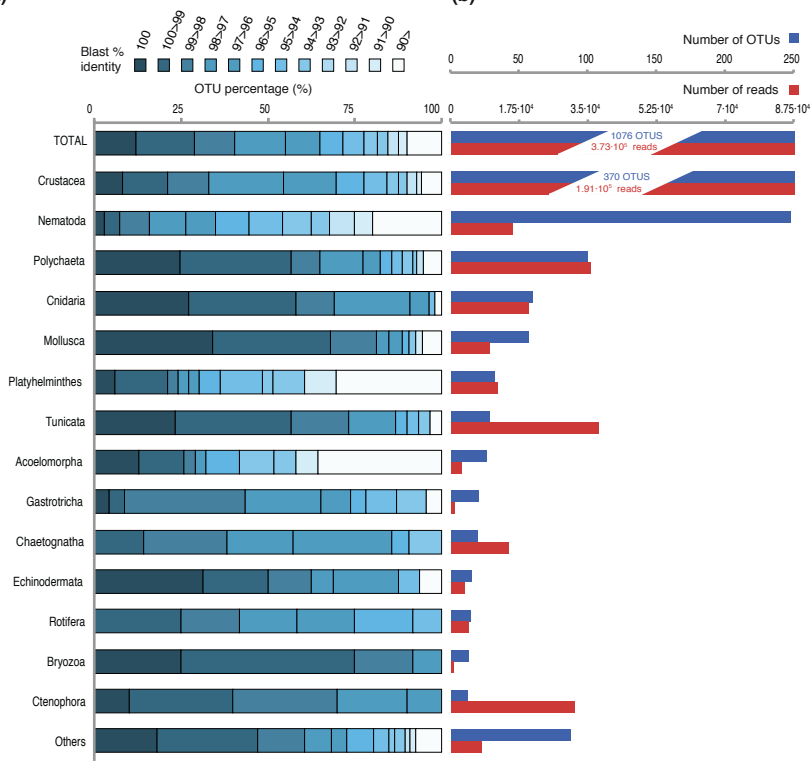

Fig 4

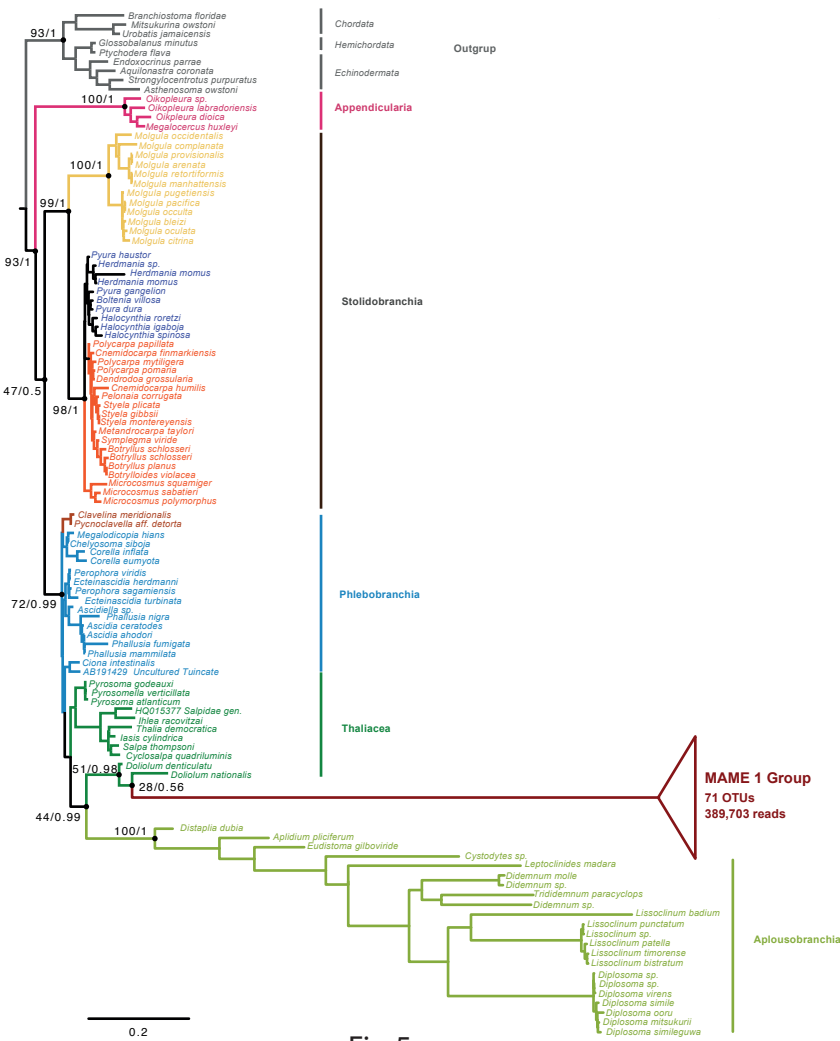

Fig 5
